# Supplementary material for: Variable-temperature NMR spectroscopy for metabolite identification in biological materials
Source: Royal Society of Chemistry journal article supplement (doi:10.1039/d1ra05626c), 2021-01-01
Supplement: d1ra05626c1.pdf [file d1ra05626c1.pdf]

# **Supplementary information**

## **for**

# **Variable-temperature NMR spectroscopy for metabolite identification in biological materials**

Ewa K. Nawrocka<sup>a,b</sup>, Mateusz Urbańczyk<sup>a,c</sup>, Kamil Koziński<sup>a</sup>, and Krzysztof Kazimierczuk<sup>a</sup>

- a) Centre of New Technologies, University of Warsaw, ul. Banacha 2C, 02-097 Warsaw, Poland
- b) Faculty of Chemistry, University of Warsaw, Pasteura 1, 02-093 Warsaw, Poland
- c) Institute of Physical Chemistry, Polish Academy of Sciences, Kasprzaka 44/52, 01-224 Warsaw, Poland

**Chemical shift dependence, ppb, on temperature, °C, for metabolites from the first artificial mixture. Temperature coefficients (TCs) as a slope of the linear function. For all diagrams, the coefficient of determination  $R^2$  is shown.**

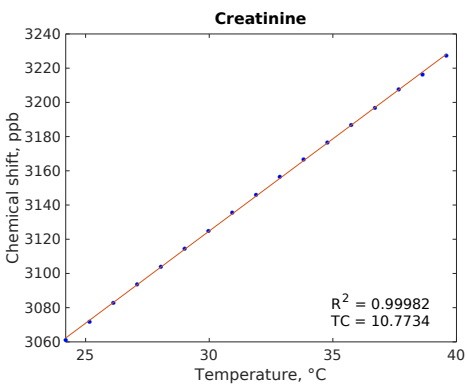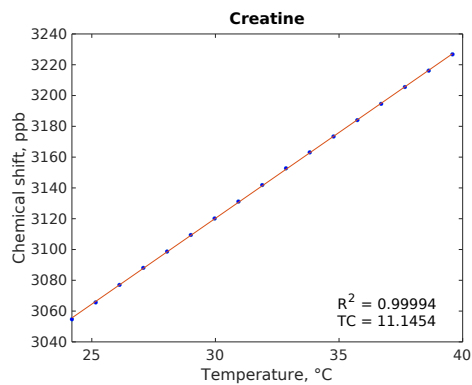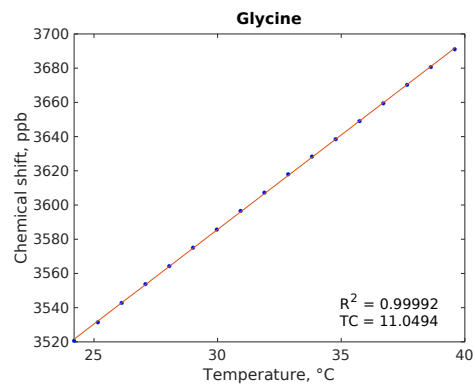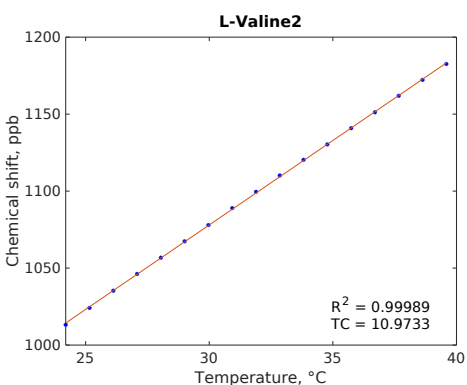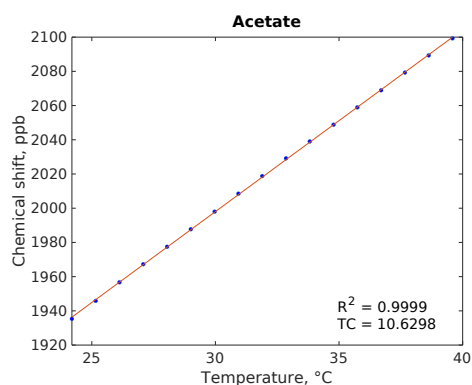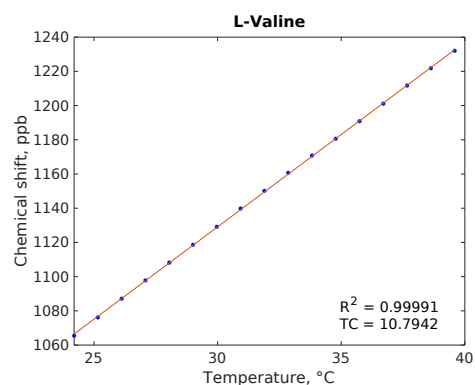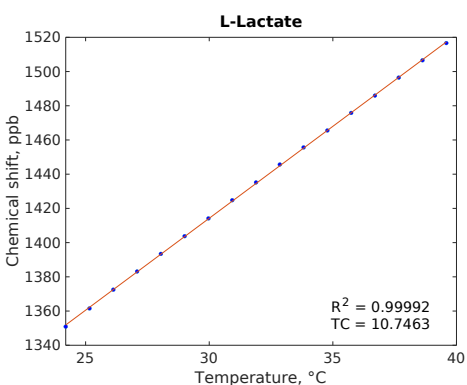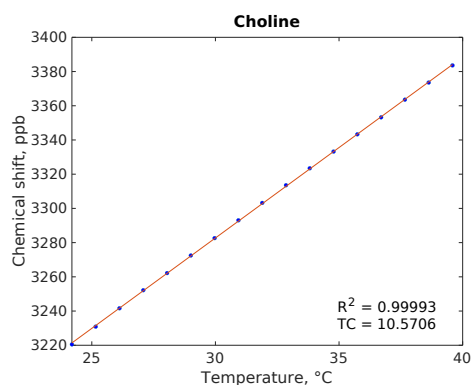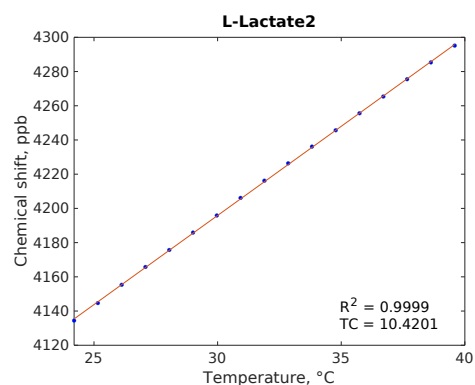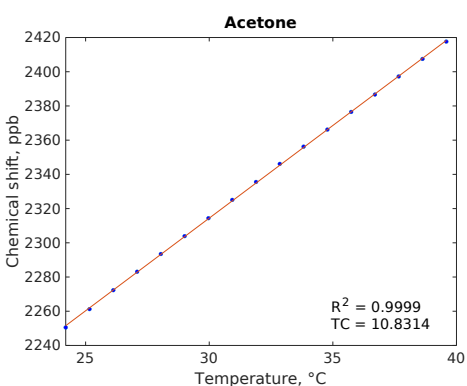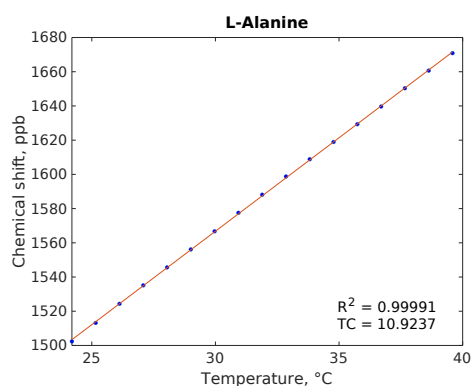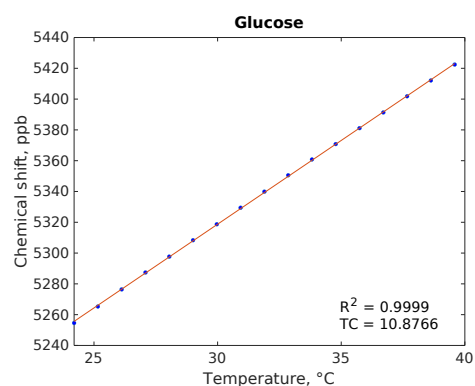

**Chemical shift dependence<sup>1</sup>, ppb, on temperature, °C,  
for NIST1950 plasma sample (experiment lasting 21 h).  
Temperature coefficients (TCs) as a slope of the linear  
function. For all diagrams, the coefficient of  
determination  $R^2$  is shown.**

---

1 Raw data, before referencing to Lactate peak

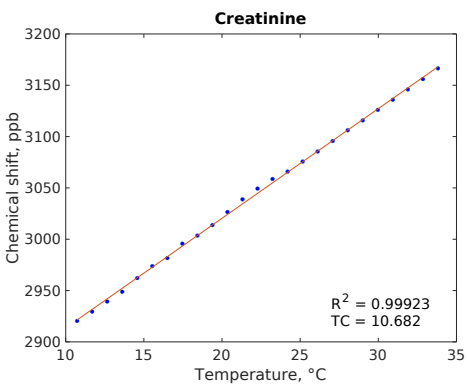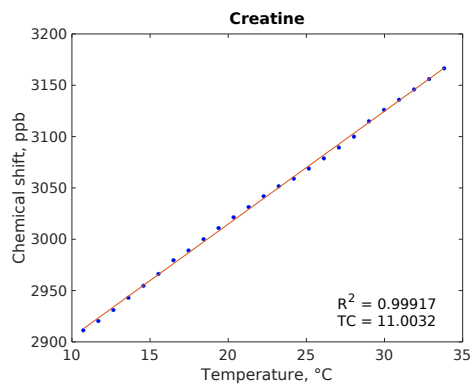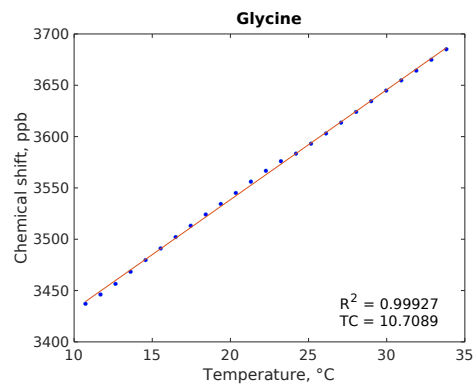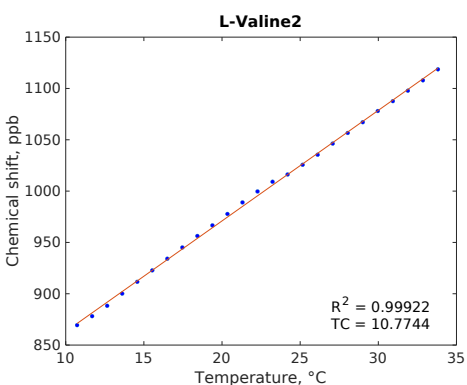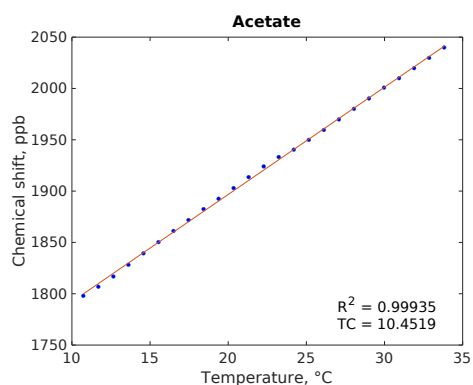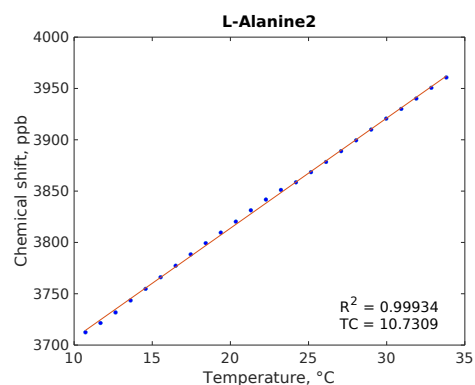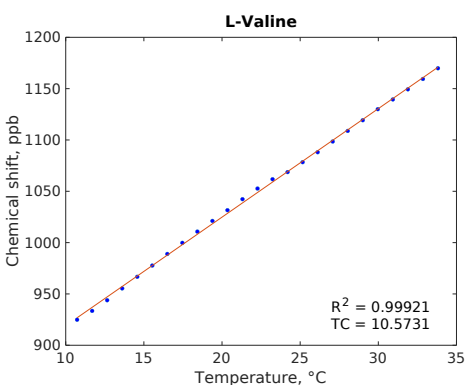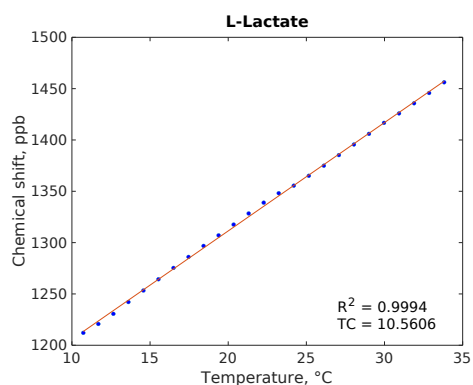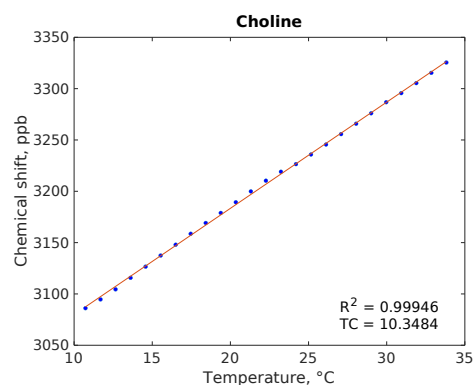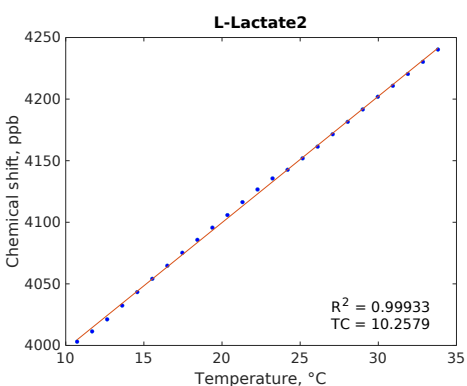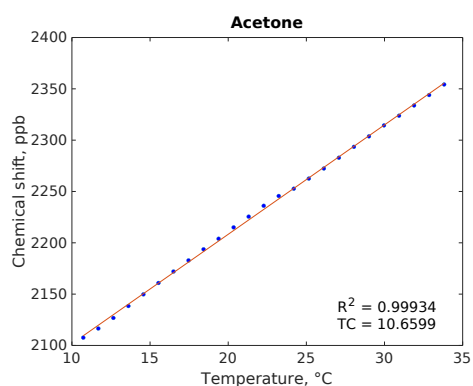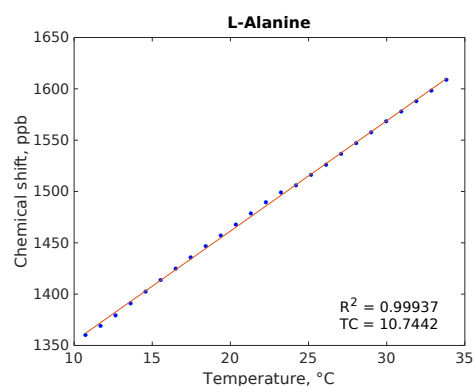

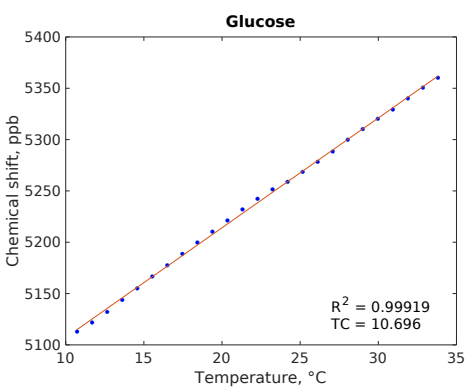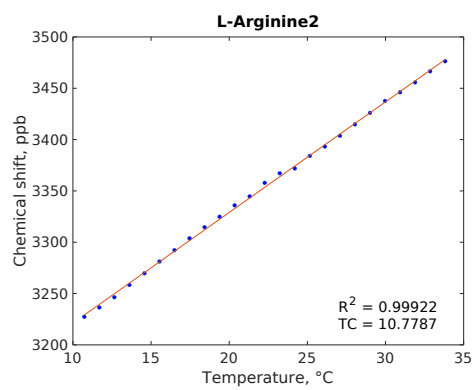

**Chemical shift dependence<sup>1</sup>, ppb, on temperature, °C, for mouse serum. Temperature coefficients (TCs) as a slope of the linear function. For all diagrams, the coefficient of determination  $R^2$  is shown.**

---

1 Raw data, before referencing to Lactate peak

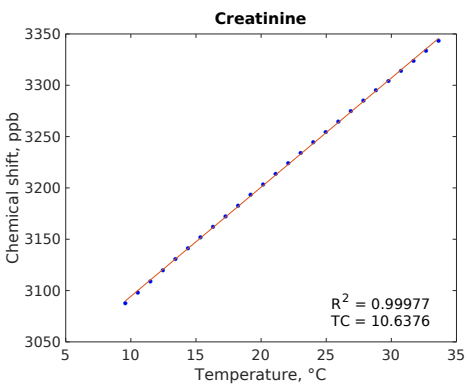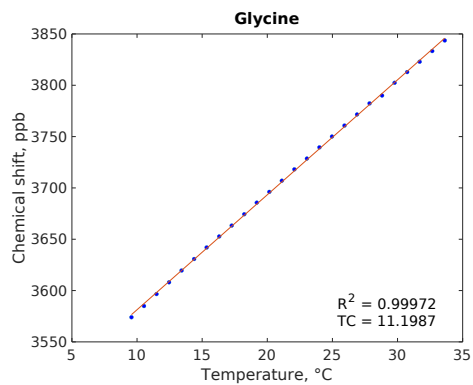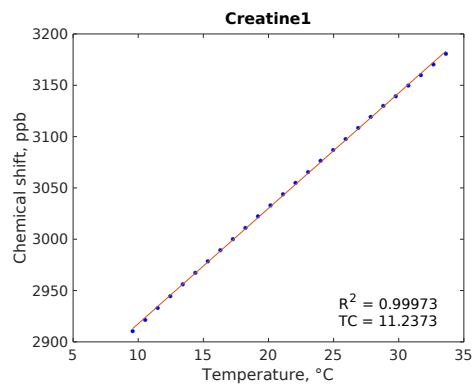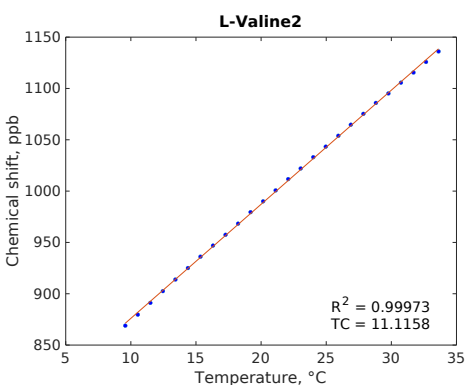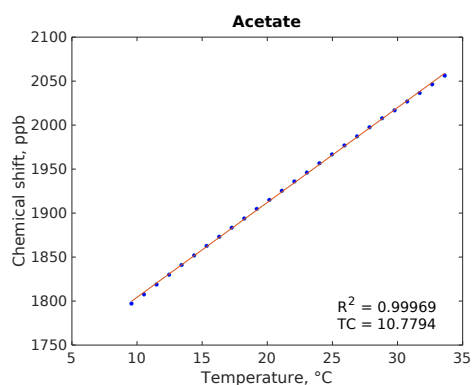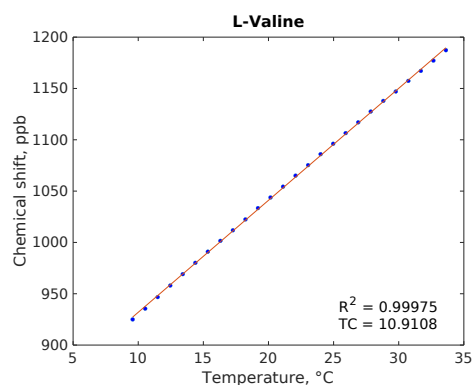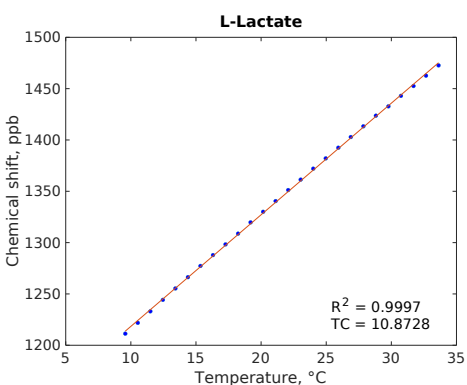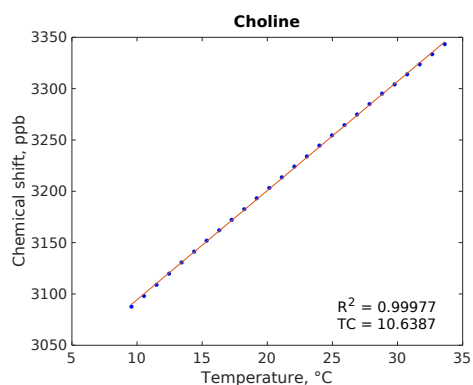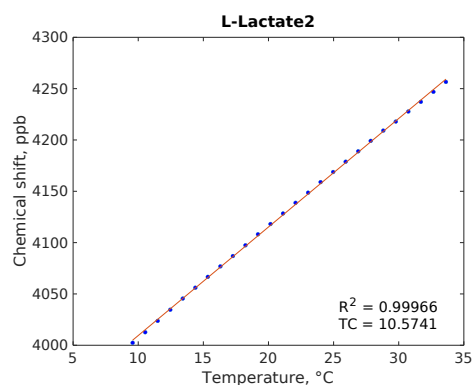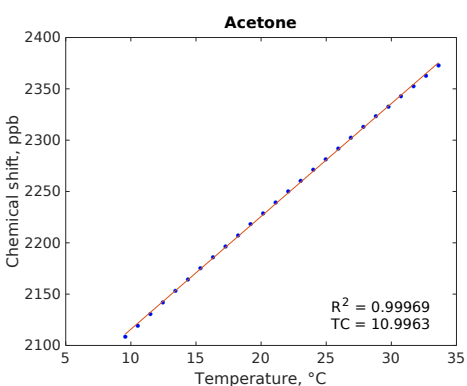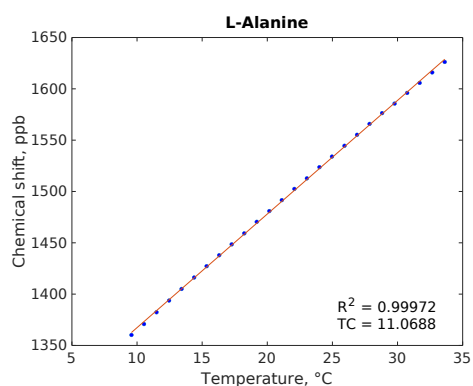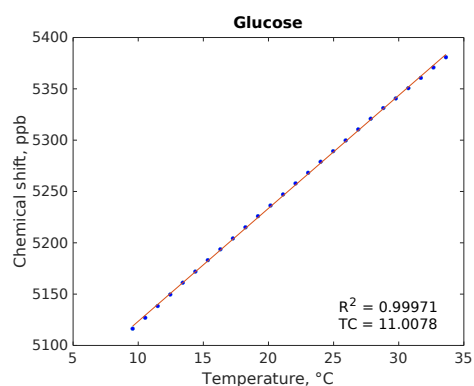



**Chemical shift dependence<sup>1</sup>, ppb, on temperature, °C, for NIST1950 plasma sample (experiment lasting 1 h). Temperature coefficients (TCs) as a slope of the linear function. For all diagrams, the coefficient of determination  $R^2$  is shown.**

---

1 Raw data, before referencing to Lactate peak

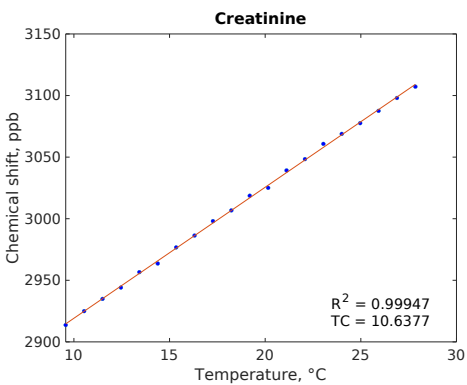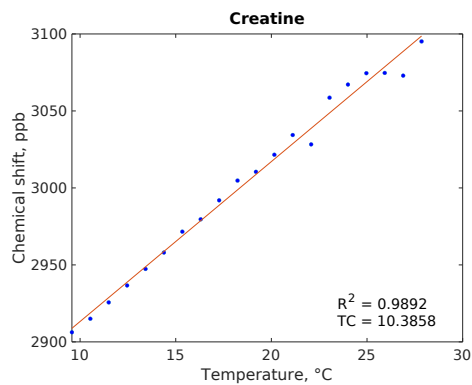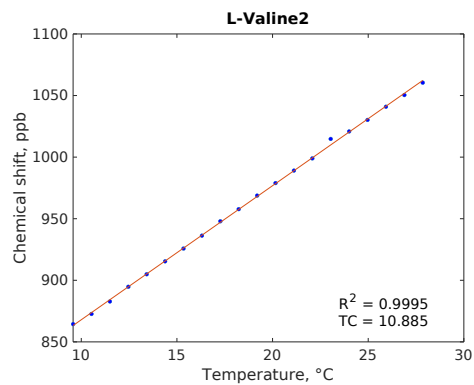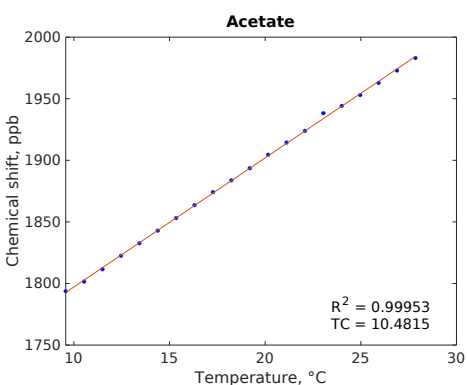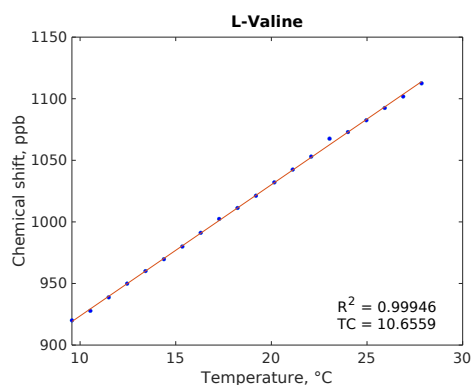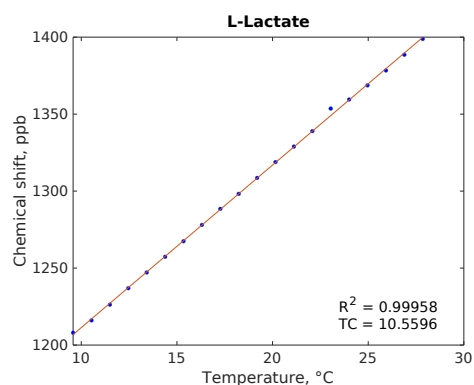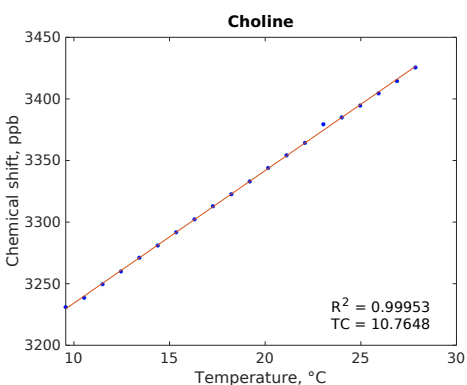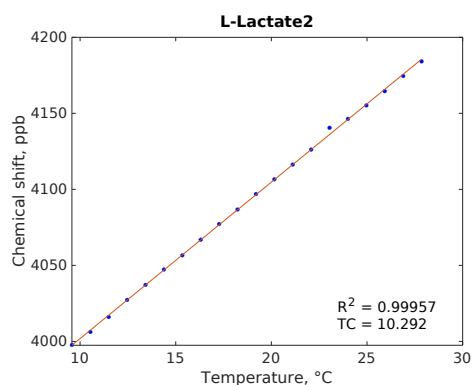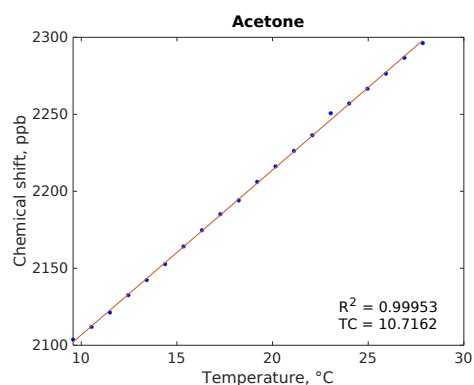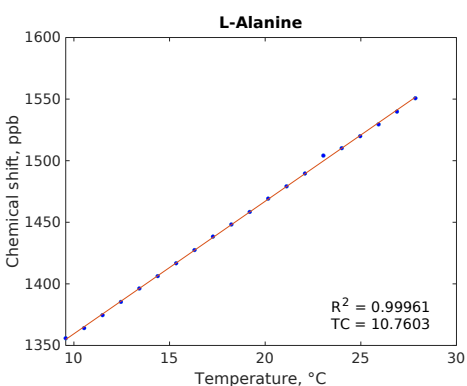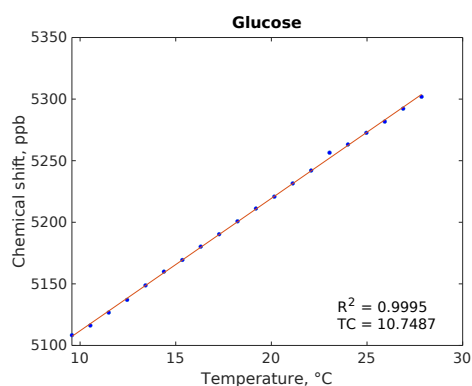

**Chemical shift dependence<sup>1</sup>, ppb, on temperature, °C,  
for metabolites from the artificial mixture 2.  
Temperature coefficients (TCs) as a slope of the linear  
function. For all diagrams, the coefficient of  
determination  $R^2$  is shown.**

---

1 Raw data, before referencing to Lactate peak

**Lactate1**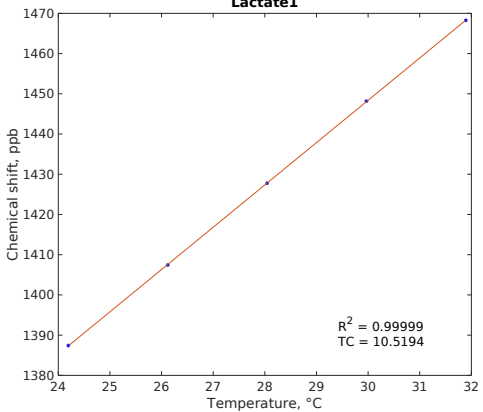**Leucine1**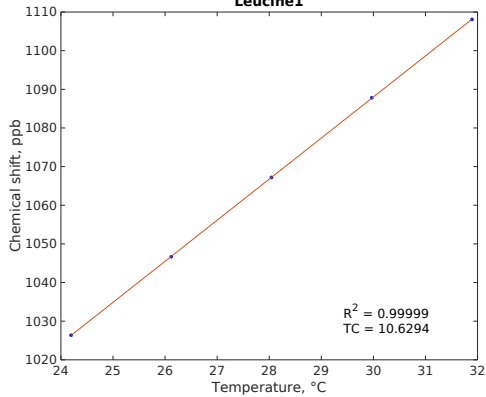**Phenylalanine6**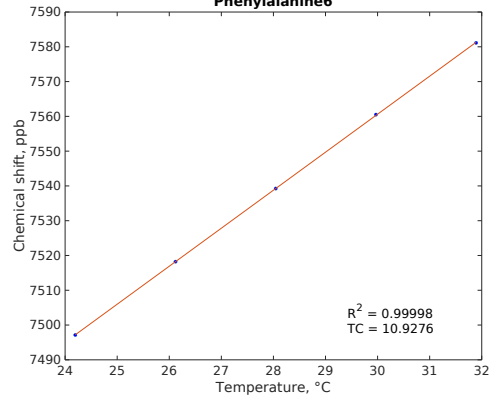**Isoleucine2**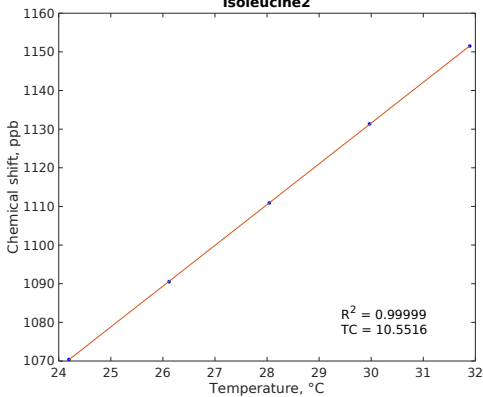**Phenylalanine5**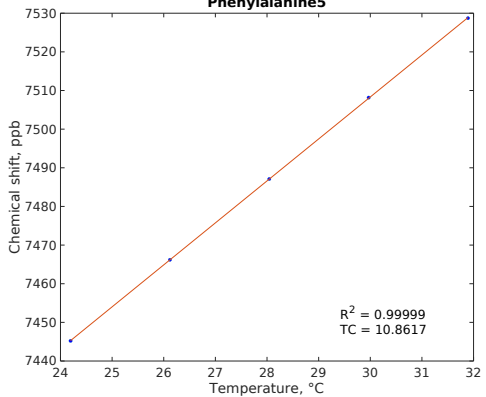**Isoleucine1**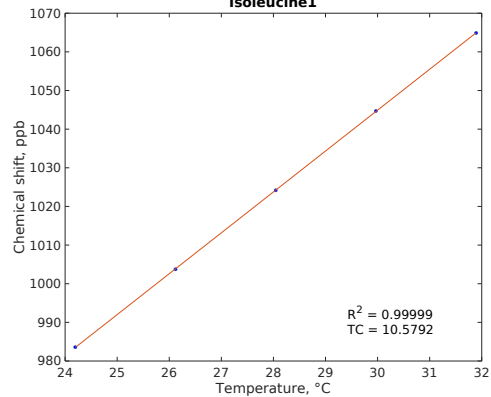**Isoleucine3**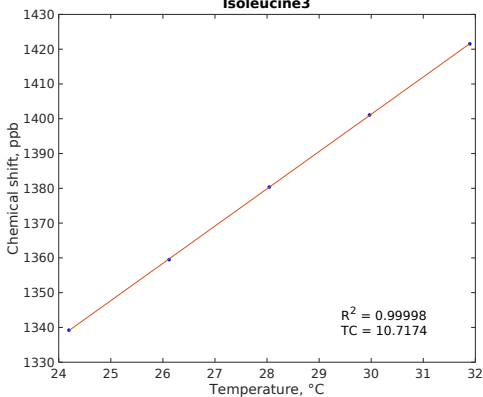**Phenylalanine4**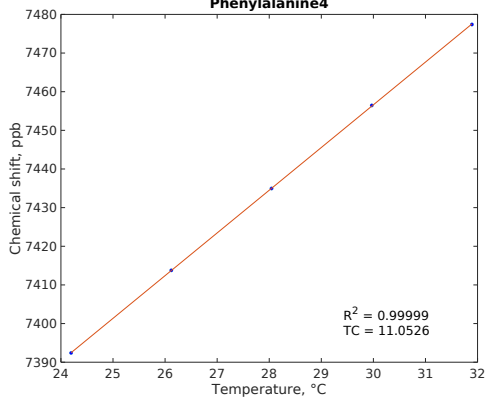

**Chemical shift dependence<sup>1</sup>, ppb, on temperature, °C, for metabolites from artificial mixture 3. Temperature coefficients (TCs) as a slope of the linear function. For all diagrams, the coefficient of determination  $R^2$  is shown.**

---

1 Raw data, before referencing to Lactate peak

S3HB - Sodium 3-hydroxybutyrate

**Lactate1**

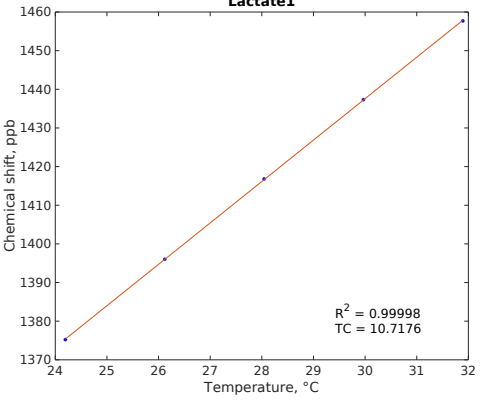

**S3HB2**

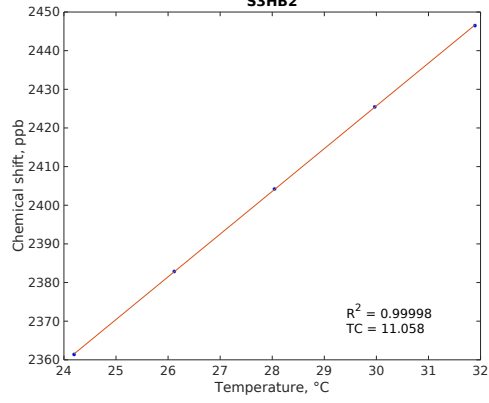

**Tyrosine5**

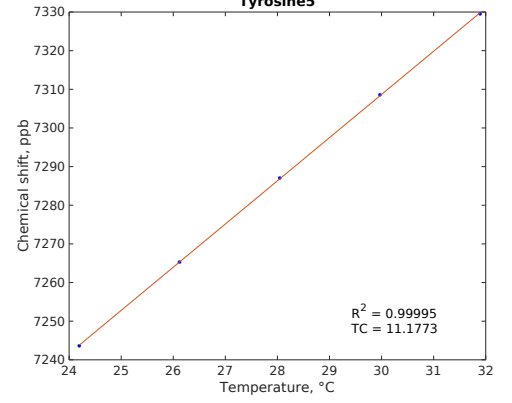

**Tyrosine4**

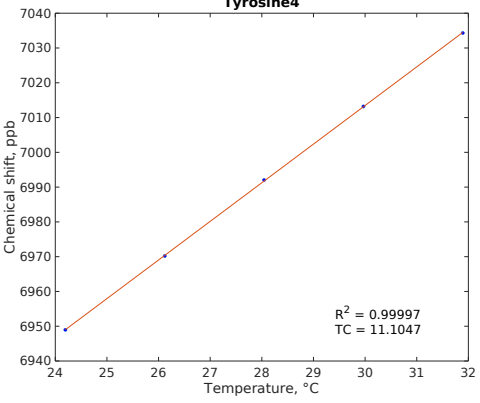

**Histidine4**

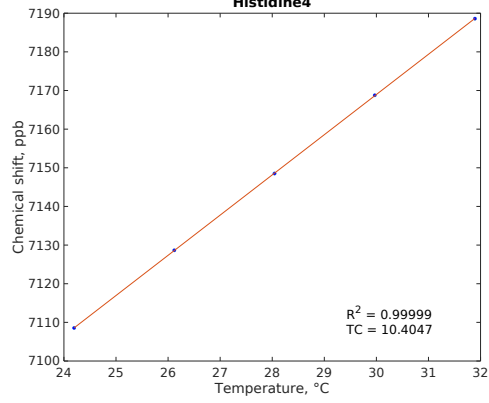

**Histidine5**

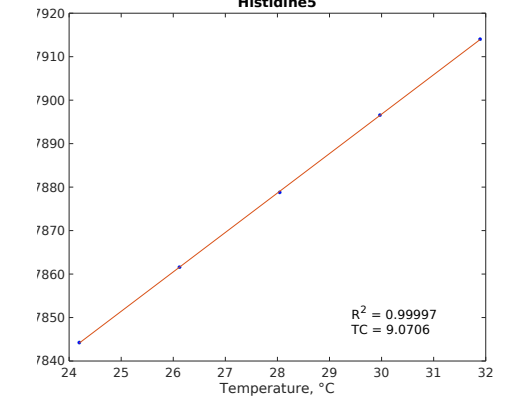

|               | Chem. shift, ppm | Temperature coefficients (TC), ppb/K after referencing to Lactate peak |                 |                |             |                                  |
|---------------|------------------|------------------------------------------------------------------------|-----------------|----------------|-------------|----------------------------------|
|               |                  | Art. mixture                                                           | NIST1950 (21 h) | NIST1950 (1 h) | Mouse serum | NIST1950 (1 h) after Radon proc. |
| Alanine       | 1.51             | 10.93                                                                  | 10.93           | 10.95          | 10.94       | 10.90                            |
| Lactate*      | 1.36             | 10.75                                                                  | 10.75           | 10.75          | 10.75       | 10.75                            |
| Lactate       | 4.14             | 10.44                                                                  | 10.48           | 10.42          | 10.45       | 10.46                            |
| Acetate       | 1.95             | 10.64                                                                  | 10.67           | 10.63          | 10.65       | 10.66                            |
| Acetone       | 2.26             | 10.85                                                                  | 10.90           | 10.83          | 10.87       | 10.94                            |
| Choline       | 3.23             | 10.53                                                                  | 10.95           | 10.57          | 10.51       | 10.60                            |
| Glucose       | 5.26             | 10.88                                                                  | 10.94           | 10.88          | 10.88       | 10.85                            |
| Creatinine    | 3.07             | 10.87                                                                  | 10.82           | 10.77          | 10.51       |                                  |
| Creatine      | 3.065            | 11.19                                                                  | 10.57           | 11.15          | 11.11       | 11.31                            |
| Valine        | 1.08             | 10.76                                                                  | 10.84           | 10.79          | 10.78       | 10.87                            |
| Valine        | 1.02             | 10.96                                                                  | 11.07           | 10.97          | 10.99       | 11.01                            |
| Leucine       | 1.03             | 10.85                                                                  | 10.84           |                | 10.80       |                                  |
| Isoleucine    | 0.99             | 10.81                                                                  | 10.76           |                | 10.79       |                                  |
| Isoleucine    | 1.07             | 10.79                                                                  | 10.73           |                | 10.76       |                                  |
| Isoleucine    | 1.31             | 10.93                                                                  | 10.82           |                | 10.90       |                                  |
| Phenylalanine | 7.39             | 11.27                                                                  | 11.30           |                | 11.47       |                                  |
| Phenylalanine | 7.43             | 11.04                                                                  | 11.90           |                | 10.86       |                                  |
| Phenylalanine | 7.49             | 11.14                                                                  | 11.12           |                | 11.07       |                                  |
| Tyrosine      | 6.94             | 11.11                                                                  | 11.16           |                | 11.24       |                                  |
| Tyrosine      | 7.24             | 11.17                                                                  | 11.22           |                | 11.33       |                                  |
| Histidine     | 7.11             | 10.45                                                                  | 10.58           |                | 10.61       |                                  |
| Histidine     | 7.84             | 9.36                                                                   | 9.57            |                | 9.61        |                                  |
| S3HB**        | 2.35             | 11.03                                                                  | 11.01           |                | 11.10       |                                  |

\* Treated as a TC reference

\*\* Sodium 3-hydroxybutyrate
